# Supplementary material for: Mesothelin-MUC16 binding is a high affinity, N-glycan dependent interaction that facilitates peritoneal metastasis of ovarian tumors
Source: Springer Nature journal article supplement (doi:10.1186/1476-4598-5-50), 2006-10-26
Supplement: 12943_2006_182_MOESM2_ESM.pdf [file 12943_2006_182_MOESM2_ESM.pdf]

| <b>Cell Combinations</b> | <b>Suspension Conditions</b> | <b>Average Percentage of Doublet Frequency*</b> |
|--------------------------|------------------------------|-------------------------------------------------|
| #7 + A431-Meso-          | 1% PBS/BSA                   | 0.8                                             |
| #7 + A431-Meso+          | 1% PBS/BSA                   | 1.5                                             |
| #12 + A431-Meso-         | 1% PBS/BSA                   | 8.5                                             |
| #12 + A431-Meso+         | 1% PBS/BSA                   | <b>25.2</b>                                     |
| #7 + A431-Meso-          | Pt. 15 ascites               | 1.4                                             |
| #7 + A431-Meso+          | Pt. 15 ascites               | 1.2                                             |
| #12 + A431-Meso-         | Pt. 15 ascites               | 4.0                                             |
| #12 + A431-Meso+         | Pt. 15 ascites               | <b>16.7</b>                                     |
| #7 + A431-Meso-          | Pt. 24 ascites               | 1.1                                             |
| #7 + A431-Meso+          | Pt. 24 ascites               | 0.9                                             |
| #12 + A431-Meso-         | Pt. 24 ascites               | 4.4                                             |
| #12 + A431-Meso+         | Pt. 24 ascites               | <b>17.1</b>                                     |

**\*Data in each row is an average of two independent experiments**
