# Supplementary material for: Mesothelin-MUC16 binding is a high affinity, N-glycan dependent interaction that facilitates peritoneal metastasis of ovarian tumors
Source: Springer Nature journal article supplement (doi:10.1186/1476-4598-5-50), 2006-10-26

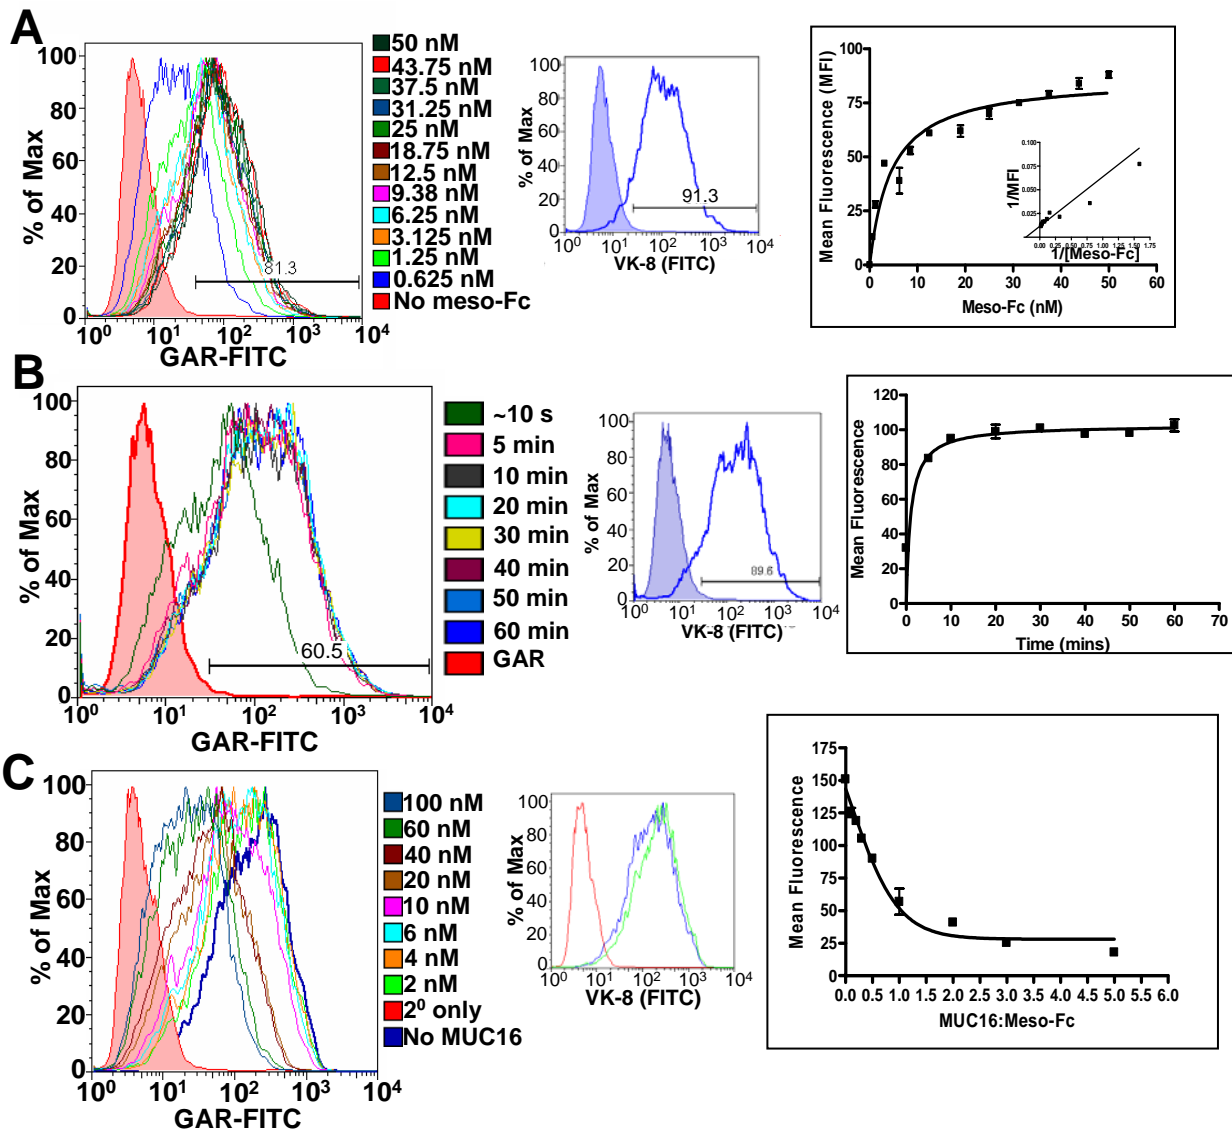

Supplement: 12943_2006_182_MOESM5_ESM.pdf [file 12943_2006_182_MOESM5_ESM.pdf]
